# Supplementary material
Source: PubMed Central journal article supplement (PMC1829299)

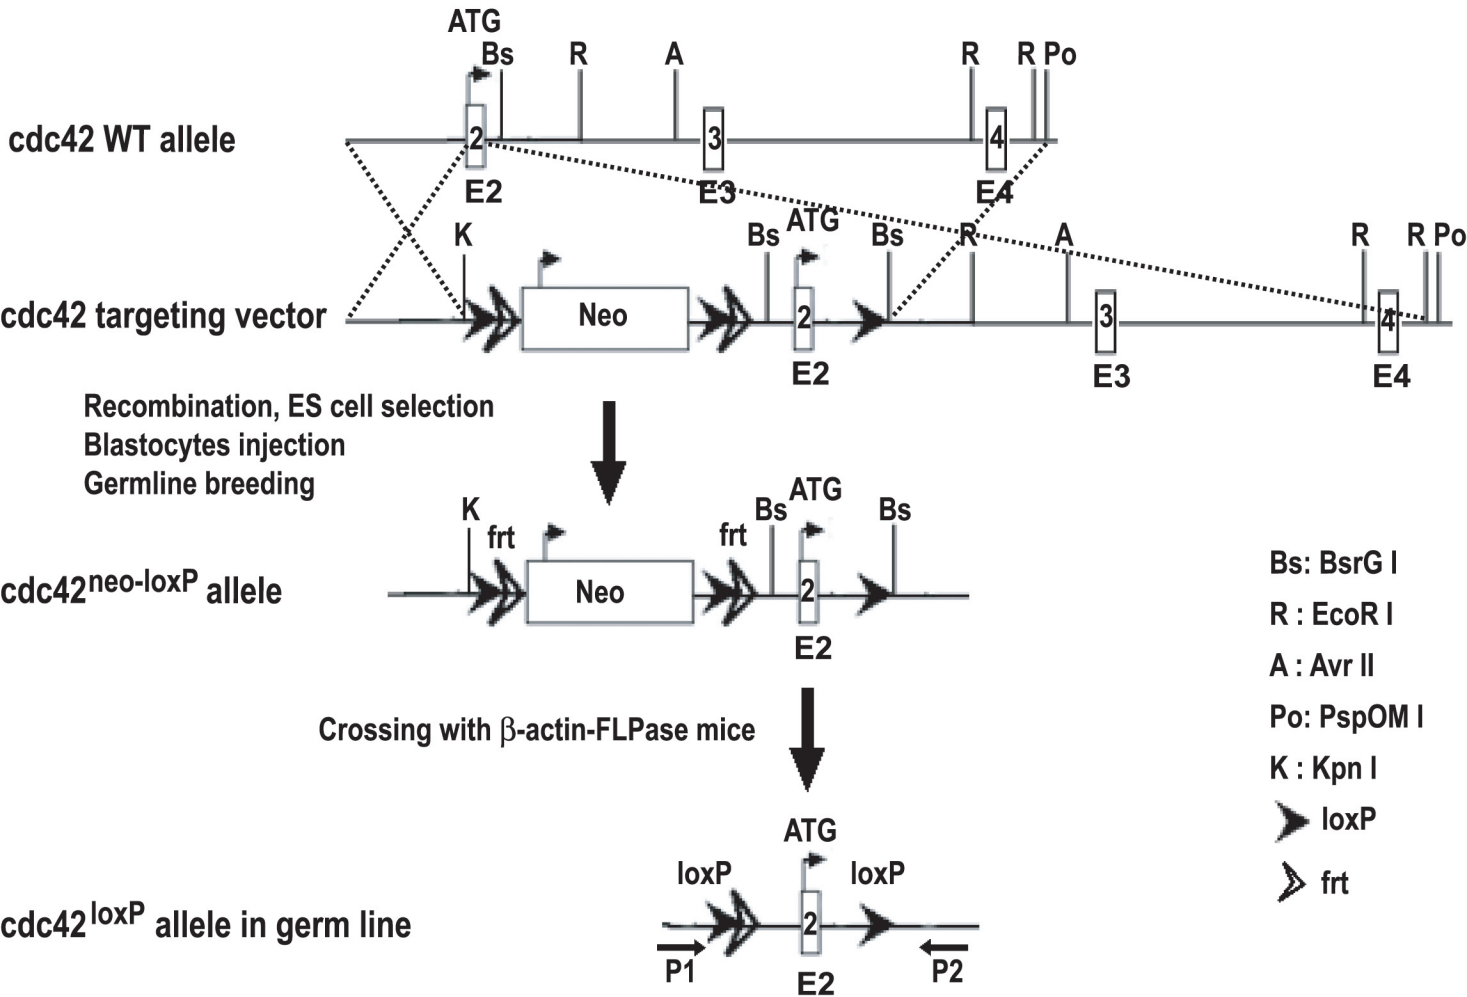

Supplement: pnas_0610819104_1.pdf [file pnas_0610819104_1.pdf]

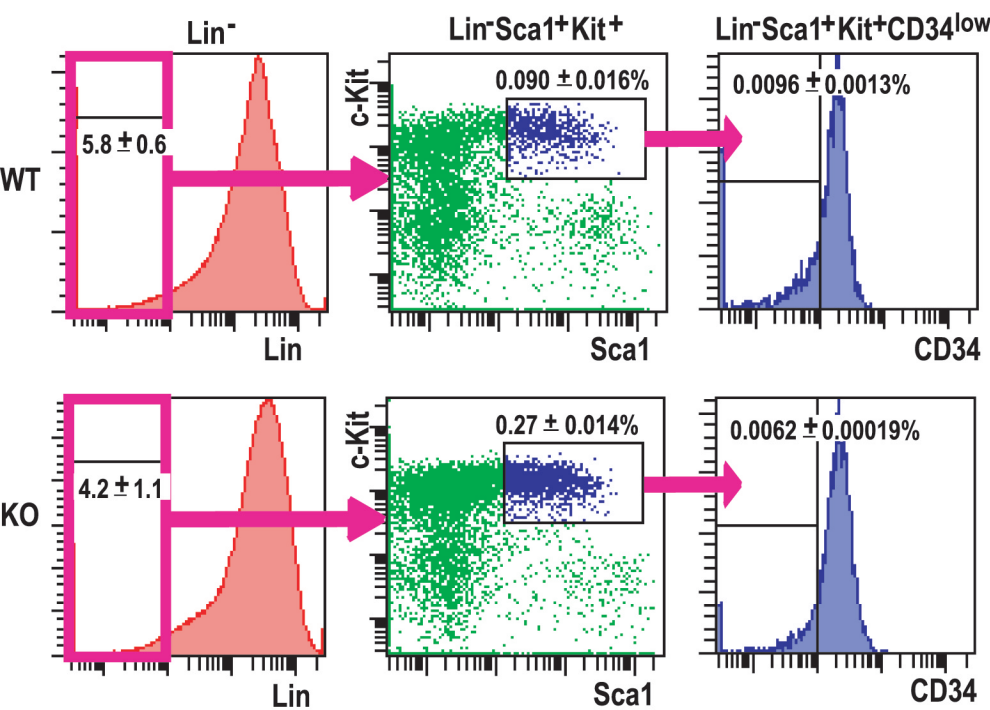

Supplement: pnas_0610819104_2.pdf [file pnas_0610819104_2.pdf]

**Annexin-V<sup>+</sup> LSK cells (%)**

**12**  
**10**  
**8**  
**6**  
**4**  
**2**  
**0**

**□ WT (n=4)**  
**■ KO (n=4)**

**WT KO**

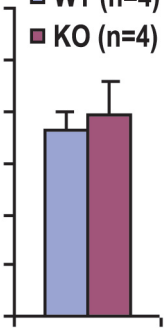

Supplement: pnas_0610819104_3.pdf [file pnas_0610819104_3.pdf]

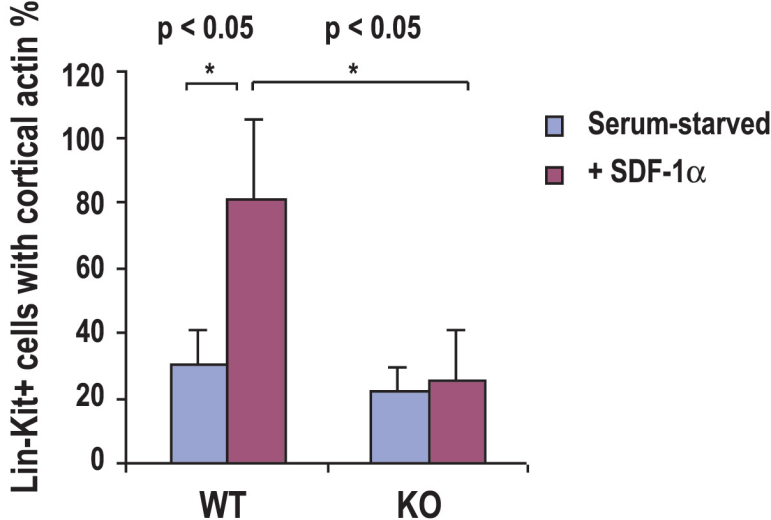

Supplement: pnas_0610819104_4.pdf [file pnas_0610819104_4.pdf]
